# Supplementary material for: Mechanics, hydrodynamics and energetics of blue whale lunge feeding: efficiency dependence on krill density
Source: Oxford University Press journal article supplement (doi:10.1242/jeb.048157), 2010-12-08
Supplement: jeb048157-sup-jeb054726correctedtable3.pdf [file jeb048157-sup-jeb054726correctedtable3.pdf]

Table 3. Effects of prey density on the efficiency of blue whale foraging dives

| Krill density (kg m <sup>-3</sup> ) | Body length (m) | Body mass (kg) | Volume filtered, total (m <sup>3</sup> ) | Krill obtained (kg) | Gross energy gain (kJ) | Energy loss, lunge (kJ) | Energy loss, diving (kJ) | Energy loss, total (kJ) | Net energy gain (kJ) | Efficiency, dive |
|-------------------------------------|-----------------|----------------|------------------------------------------|---------------------|------------------------|-------------------------|--------------------------|-------------------------|----------------------|------------------|
| 0.15                                | 22              | 61,318         | 210                                      | 32                  | 123,648                | 11,292                  | 29,475                   | 40,767                  | 82,881               | 3.0              |
|                                     | 25              | 96,568         | 280                                      | 43                  | 166,152                | 22,053                  | 41,403                   | 63,455                  | 102,696              | 2.6              |
|                                     | 27              | 122,605        | 385                                      | 58                  | 224,112                | 28,250                  | 49,499                   | 77,749                  | 146,363              | 2.9              |
| 0.50                                | 22              | 61,318         | 210                                      | 105                 | 405,720                | 11,292                  | 29,475                   | 40,767                  | 364,953              | 10               |
|                                     | 25              | 96,568         | 280                                      | 140                 | 540,960                | 22,053                  | 41,403                   | 63,455                  | 477,504              | 8.5              |
|                                     | 27              | 122,605        | 385                                      | 193                 | 745,752                | 28,250                  | 49,499                   | 77,749                  | 668,003              | 9.6              |
| 1.65                                | 22              | 61,318         | 210                                      | 347                 | 1,340,808              | 11,292                  | 29,475                   | 40,767                  | 1,300,041            | 33               |
|                                     | 25              | 96,568         | 280                                      | 462                 | 1,785,168              | 22,053                  | 41,403                   | 63,455                  | 1,721,712            | 28               |
|                                     | 27              | 122,605        | 385                                      | 635                 | 2,453,640              | 28,250                  | 49,499                   | 77,749                  | 2,375,891            | 32               |
| 4.50                                | 22              | 61,318         | 210                                      | 945                 | 3,651,480              | 11,292                  | 29,475                   | 40,767                  | 3,610,713            | 90               |
|                                     | *25             | 96,568         | 280                                      | 1,260               | 4,868,640              | 22,053                  | 41,403                   | 63,455                  | 4,805,184            | 77               |
|                                     | 27              | 122,605        | 385                                      | 1,733               | 6,696,312              | 28,250                  | 49,499                   | 77,749                  | 6,618,563            | 86               |

All calculations correspond to foraging dives that average 200 m deep and a lunge frequency of 3.5 lunges per dive; dive duration was 9.8 min followed by a surface recovery period of 2.7 min, as determined from tag data (Table 1). Gross energy gain represents the energy density of krill after accounting for assimilation efficiency. The energetic cost of diving represents all costs that are not associated with lunge feeding *per se*, except for the filter phase between lunges. Efficiency is the ratio of gross energy gain to the total energy loss in a dive. \*Data in this row used in Fig. A1.
